# Supplementary material for: Spike Avalanches Exhibit Universal Dynamics across the Sleep-Wake Cycle
Source: PLOS journal article supplement (doi:10.1371/journal.pone.0014129), 2010-11-30
Supplement: S5 (10.1371/journal.pone.0014129.s005) [file journal.pone.0014129.s005]

**Size distributions are similar regardless of behavioral state or stage of the experiment.**

See Supporting Information Text S1 for detailed statistical analysis.

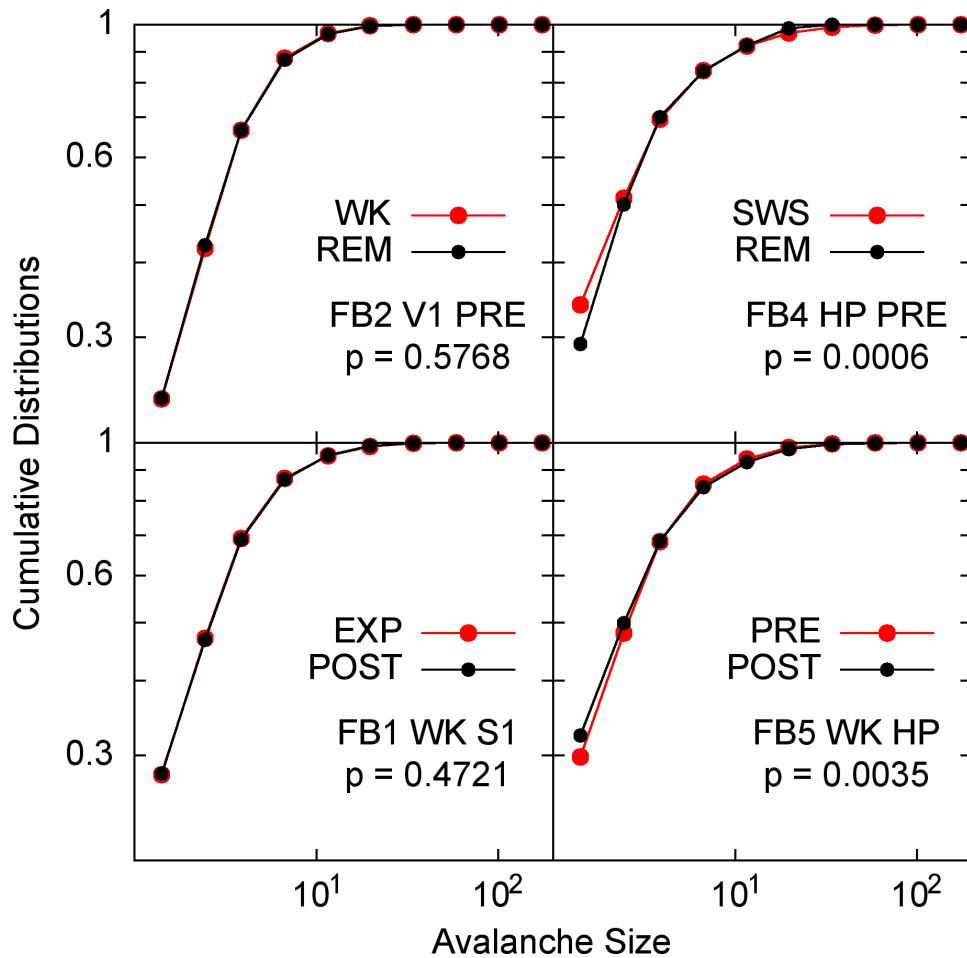

**Fig. S5: Comparison of FB cumulative avalanche size distributions for different states and stages of the experiment.** Cumulative distributions are shown together with the  $p$ -values calculated from the KS tests. Note that the distributions are very similar in all cases, but only the ones in the left column pass the KS test.
