# Supplementary material for: Spike Avalanches Exhibit Universal Dynamics across the Sleep-Wake Cycle
Source: PLOS journal article supplement (doi:10.1371/journal.pone.0014129), 2010-11-30
Supplement: S6 (10.1371/journal.pone.0014129.s006) [file journal.pone.0014129.s006]

## Size distributions from anesthetized animals are similar to truncated power-laws.

See Supporting Information Text S1 for detailed statistical analysis.

In Fig. S6a, we show the fit of the truncated power law. The Q-Q plot in Fig. S6b compares the data versus the fitted function by plotting their quantiles against each other. A perfect fit should yield a straight Q-Q plot with slope  $a=1$ , so we calculated the linear correlation coefficient  $R$  and the best-fitted slope  $a$  to assess the goodness-of-fit. We obtained  $R=0.99$  and  $a=1.00$ , which indicates that the truncated power law provided indeed a good fit to the data.

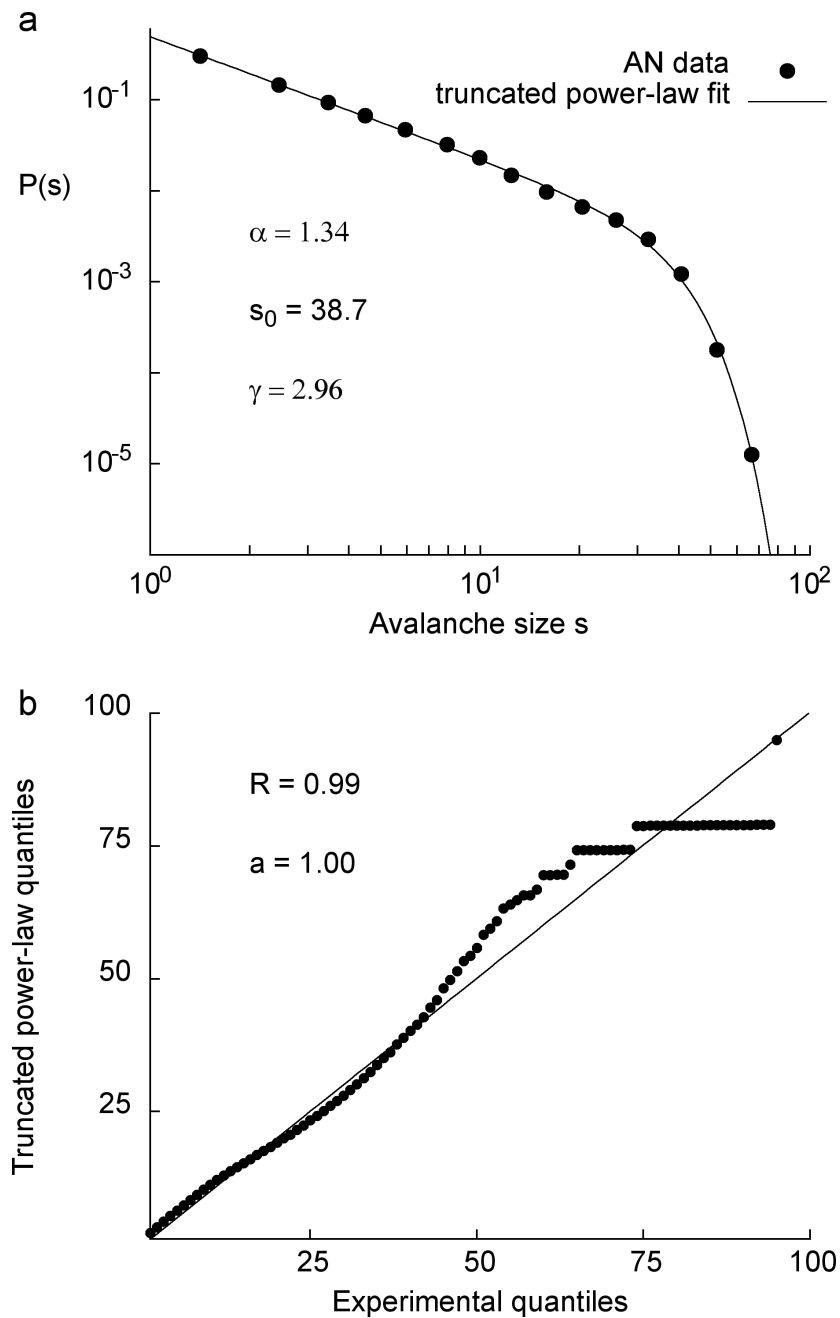

**S6: Size distribution from AN data and the truncated power-law.** (a) Avalanche size distribution for one AN rat and the truncated power-law fit (see text). (b) QQ-plot for the same AN data and fit. The solid line represents the linear fit which resulted in the slope  $a=1$ .
